# Supplementary material for: First demonstration of in situ Lu–Hf dating using LA-ICP-MS/MS applied to monazite
Source: Royal Society of Chemistry journal article supplement (doi:10.1039/d4ja00258j), 2024-01-01
Supplement: d4ja00258j1.xlsx [file d4ja00258j1.xlsx]

## Sheet: PlotDat5
Source sheet	Data	0.3	1392.46	1	1379.36	23.3677
Plot name	Average3	15.7	1392.46	2	1425.76	32.4512
Plot Type	15			3	1392.36	23.6501
1st free col	8			4	1397.07	24.6813
Sigma Level	2			5	1366.54	25.657
Absolute Errs	TRUE			6	1384.12	27.027
Symbol Type	1			7	1385.21	27.1601
Inverse Plot	FALSE			8	1389.45	29.8458
Color Plot	TRUE			9	1392.27	30.8116
3D plot	FALSE			10	1397.85	26.6639
Linear	FALSE			11	1402.64	30.1788
Data Range	D3:E18			12	1387.76	28.2355
Filled Symbols	FALSE			13	1396.15	24.3696
ConcAge	FALSE			14	1409.17	24.3148
ConcSwap	FALSE			15	1396.85	49.9498
1st Symbol-row	1			IsoLine	IsoLine	IsoLine	IsoLine

## Sheet: ESI Table S1
	ESI Table S1 The common Hf contents of the eight monazite samples
	RW-1		44069		ELK		Maine1		Maine2		117531		Vermillion		Namaqualand
	n	f176Hf	n	f176Hf	n	f176Hf	n	f176Hf	n	f176Hf	n	f176Hf	n	f176Hf	n	f176Hf
	1	1.3583	1	22.9384	1	1.55679	1	6.21173	1	0.838562	1	78.4335	1	1.09484	1	0.483654
	2	0.645977	2	0.270191	2	1.74799	2	2.02635	2	11.4706	2	2.94791	2	1.29431	2	1.54355
	3	0.678376	3	1.14052	3	1.89312	3	2.03501	3	1.54547	3	5.02575	3	0.572392	3	76.4293
	4	0.82748	4	0.409879	4	1.68678	4	0.437948	4	0.81569	4	3.89051	4	50.7069	4	34.9722
	5	0.402961	5	0.952395	5	2.0563	5	7.50166	5	2.83255	5	6.34478	5	0.33404	5	24.2364
	6	0.474799	6	3.39587	6	2.05329	6	1.51862	6	9.28455	6	16.5763	6	16.0526	6	3.09634
	7	1.05148	7	4.2042	7	2.06311	7	0.968125	7	10.0505	7	65.112	7	6.82073	7	1.7814
	8	0.585521	8	3.34353	8	1.97401	8	0.719589	8	1.10145	8	50.594	8	7.90242	8	4.09813
	9	0.187832	9	5.29676	9	2.0501	9	1.78734	9	13.5392	9	4.088	9	2.26454	9	7.70801
	10	0.342615	10	0.323249	10	1.94899	10	2.12851	10	2.29685	10	8.0989	10	9.6956	10	7.52243
	11	0.336498	11	1.8191	11	1.80417	11	3.8022	11	2.7744	11	4.91474	11	83.7298	11	24.437
	12	2.07303	12	0.569209	12	1.83814	12	2.52535	12	4.91376	12	45.1134	12	2.20901	12	5.42673
	13	0.147902	13	1.4597	13	1.92825	13	3.18763	13	6.22961	13	7.7905	13	0.846424	13	4.80763
	14	0.71288	14	2.72828	14	1.8891	14	1.56385	14	3.15947	14	9.14521	14	0.547868	14	3.02448
	15	1.13177	15	3.42457	15	1.11174	15	1.35996	15	68.5743	15	35.4347	15	93.2111	15	0.443261
	16	0.64662	16	3.40151	16	0.694934	16	1.95376	16	55.4065	16	2.38816	16	0.818326	16	8.92062
	17	0.818668	17	0.632885	17	5.33843	17	1.13183	17	1.66835	17	9.21324	17	1.4429	17	40.9711
	18	0.68995	18	1.14796	18	2.6438	18	9.79109	18	0.0155616	18	5.92768	18	1.39429	18	41.259
	19	0.243625	19	2.29771	19	5.15543	19	1.24572	19	3.65355	19	57.6793	19	1.23628	19	10.6587
	20	0.874389	20	0.970553	20	5.73142	20	1.71307	20	0.029791	20	1.10421	20	43.6214	20	70.2619
	21	2.67123	21	1.15262	21	5.61992	21	2.77837	21	0.0322896	21	9.69909	21	2.06271	21	60.4914
	22	0.74755	22	4.65029	22	1.84662	22	3.63792	22	0.050514	22	2.65115	22	0.353182	22	89.921
	23	0.10279	23	0.509054	23	6.10674	23	1.39202	23	0.0469075	23	2.1351	23	0.950608	23	94.0132
	24	0.572166	24	2.73637	24	3.35219	24	1.52385	24	93.3266	24	2.95759	24	1.79644	24	93.6975
	25	0.542264	25	2.34682	25	5.3625	25	2.72818	25	82.6469	25	7.28744	25	7.3522	25	89.1539
	26	0.598278	26	1.36623	26	4.60585	26	1.30567	26	93.9139	26	0.912256	26	0.473618	26	62.7222
	27	0.115603	27	1.61622	27	2.19293	27	2.08909	27	13.5987	27	78.3623	27	0.12214	27	11.5296
	28	0.528803	28	1.1848	28	2.58517	28	1.30875	28	33.7443	28	0.77647	28	99.1115	28	1.13009
	29	0.868424	29	2.45558	29	2.39163	29	2.74641	29	0.15191	29	25.1511	29	98.6514	29	21.0694
	30	0.880906	30	0.443202	30	6.79728	30	1.68093	30	2.36305	30	5.01062	30	98.4858	30	1.47666
	31	0.124198	31	0.903918	31	5.24929	31	0.81844	31	79.7351	31	0.273242	31	101.22	31	54.9962
	32	0.188445	32	1.93871	32	5.81342	32	1.40526	32	86.5466	32	2.7377	32	73.7012	32	88.4357
	33	0.361368	33	1.91947	33	5.57891	33	1.73209	33	2.82183	33	0.213353	33	71.9683	33	91.6007
	34	1.29425	34	1.40482	34	2.83168	34	6.47061	34	4.84569			34	98.7973	34	84.5127
	35	0.435805	35	2.20861	35	1.64341	35	1.68039	35	78.9505			35	96.0571	35	9.10047
	36	0.567294	36	6.34037	36	1.89002	36	3.04176	36	35.5625			36	100.292	36	22.868
	37	0.141804	37	69.8801	37	2.15945	37	0.651551	37	9.70887			37	98.5419
	38	0.304229			38	2.45558	38	5.65132	38	0.261447			38	13.7967
	39	0.964419			39	4.96069	39	1.07931	39	0.20311			39	39.1309
	40	0.114552			40	3.49436	40	11.4404					40	63.5998
	41	0.646404
	42	0.75436
	43	0.684564
