# Supplementary material for: First demonstration of in situ Lu–Hf dating using LA-ICP-MS/MS applied to monazite
Source: Royal Society of Chemistry journal article supplement (doi:10.1039/d4ja00258j), 2024-01-01
Supplement: d4ja00258j3.pdf [file d4ja00258j3.pdf]

**Method 1**

**Method 2**

**Method 3**

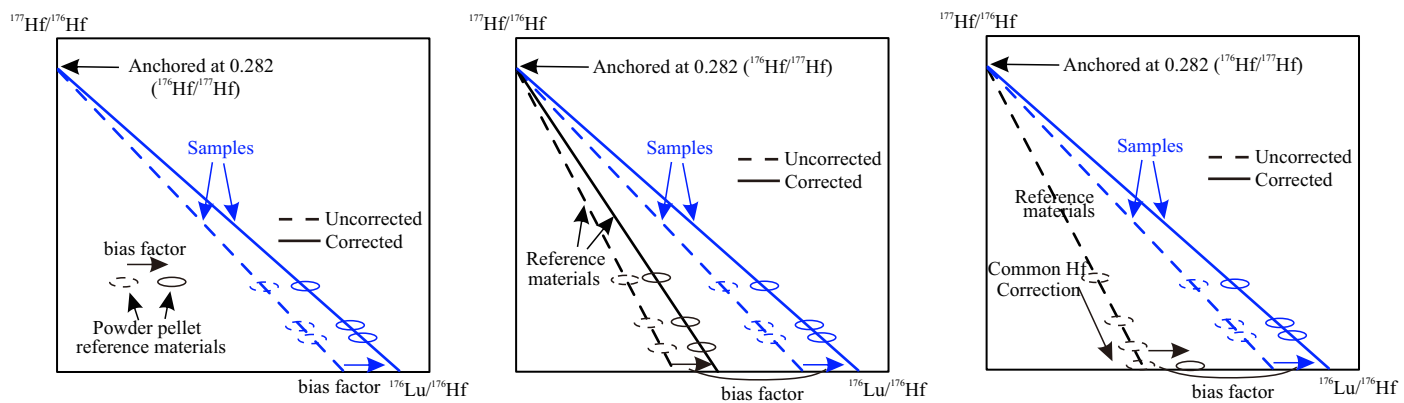

Figure S1. Schematic diagrams of three calibration approaches. Method 3 is used in this study.
